# Supplementary material
Source: PubMed Central journal article supplement (PMC2843184)
Supplement: supp_M109.089987_jbc.M109.089987-1.pdf [file supp_M109.089987_jbc.M109.089987-1.pdf]

# Supplemental Figure 1.

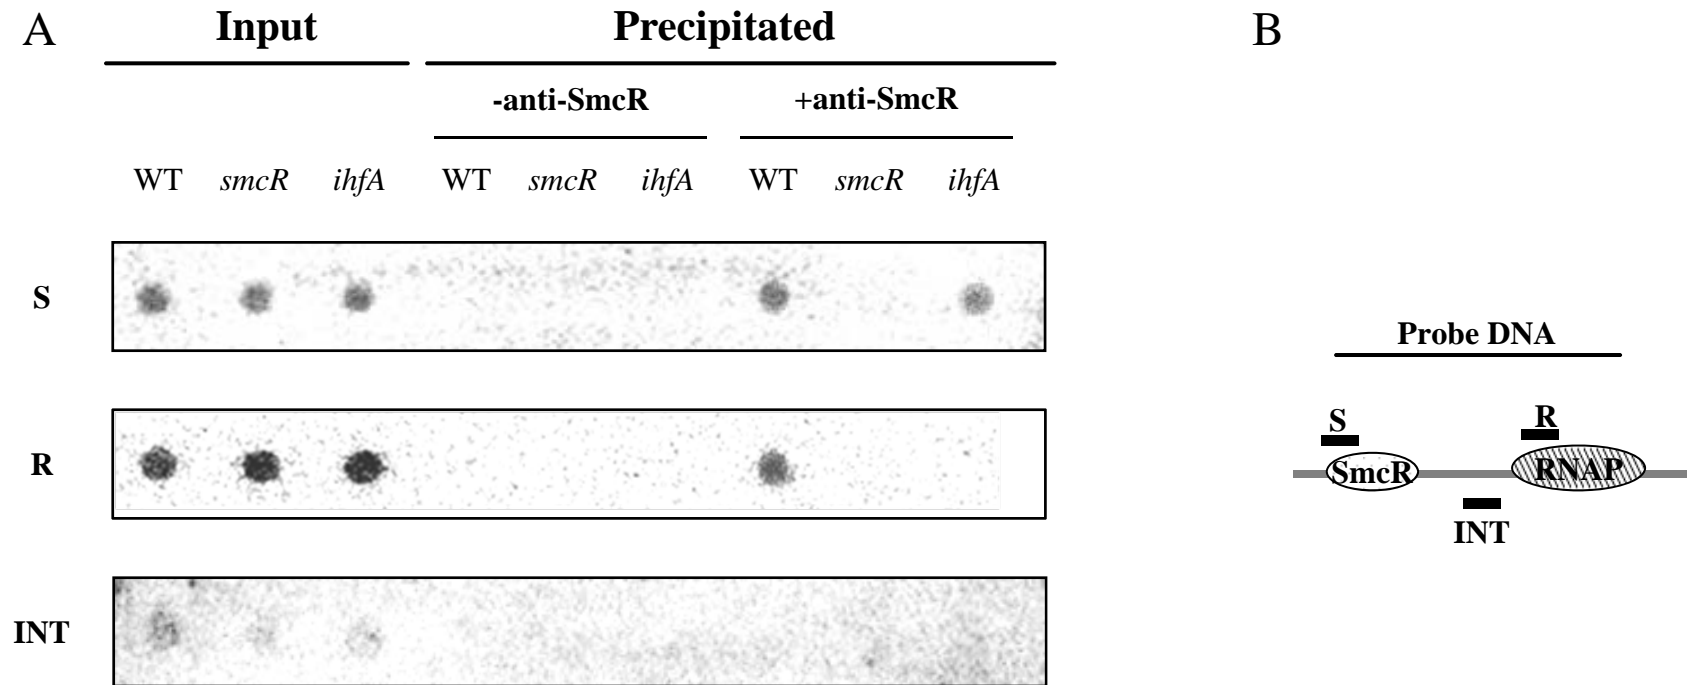

**Supplemental Figure 1.** The cells were cross-linked, washed, then sonicated to produce sheared chromatin as described in ( Materials and Methods. DNase I was added to the sheared chromatin to reduce their average sizes. The DNA was purified from the DNase I treated chromatin fragments before precipitation (input, positive control) and after precipitation in the presence (+) or absence (-) of the anti-SmcR antibody. (A) The presence of the specific DNA fragment in the chromatin precipitate was analyzed by Southern dot blot analyses. The DNA was transferred to a NYLON membrane (Roche, Indianapolis, IN) and then hybridized with the  $^{32}\text{P}$ -labeled oligonucleotide probes, S, R, and INT, as indicated. The probes were labeled using  $[\gamma\text{-}^{32}\text{P}]\text{ATP}$  as described previously (28). (B) The locations of each DNA probe used for the Southern dot blot analyses are depicted by closed bars. Nucleotide sequences for S, 5'-CATTTATCTTATTGATAAA-3'; INT, 5'-GAGATGGATTCTTTGTATA-3'; R, 5'-AACATTTTTTGGTGAAGTTG-3'
